# Supplementary material for: Genetic Factors of Predisposition and Clinical Characteristics of Rheumatoid Arthritis in Russian Patients
Source: MDPI journal article supplement (doi:10.3390/jpm11060469), 2021-05-25
Supplement: s1 [file s1]

Table S1. Statistically significant results of an association analysis between SNPs of non-HLA genes and clinical baseline characteristics of patients.

| SNP / Gene (nucleotide substitution) | Genotypes   |             |             | p-value |
|--------------------------------------|-------------|-------------|-------------|---------|
| <b>rs3093024 / CCR6 (A&gt;G)</b>     | <b>A/A</b>  | <b>A/G</b>  | <b>G/G</b>  |         |
| Age (years)                          |             |             |             | 0.0019  |
| n                                    | 30          | 60          | 35          |         |
| mean                                 | 48.6        | 54.4        | 44.9        |         |
| SD                                   | 12.55       | 12.37       | 12.97       |         |
| <b>rs2104286 / IL2RA (T&gt;C)</b>    | <b>T/T</b>  | <b>T/C</b>  | <b>C/C</b>  |         |
| Age (years)                          |             |             |             | 0.0119  |
| n                                    | 77          | 42          | 6           |         |
| mean                                 | 52.5        | 45.6        | 56.5        |         |
| SD                                   | 12.66       | 13.55       | 6.02        |         |
| <b>rs419598 / IL1RN (T&gt;C)</b>     | <b>T/T</b>  | <b>T/C</b>  | <b>C/C</b>  |         |
| Age (years)                          |             |             |             | 0.0131  |
| n                                    | 67          | 47          | 11          |         |
| mean                                 | 52.9        | 46.0        | 53.8        |         |
| SD                                   | 13.12       | 11.58       | 15.48       |         |
| <b>rs549908 / IL18 (T&gt;G)</b>      | <b>T/T</b>  | <b>T/G</b>  | <b>G/G</b>  |         |
| Age (years)                          |             |             |             | 0.0269  |
| n                                    | 63          | 56          | 6           |         |
| mean                                 | 48.3        | 51.4        | 62.7        |         |
| SD                                   | 12.65       | 12.93       | 14.50       |         |
| <b>rs1800629 / TNF (G&gt;A)</b>      | <b>G/G</b>  | <b>G/A</b>  | <b>A/A</b>  |         |
| Age (years)                          |             |             |             | 0.0275  |
| n                                    | 104         | 21          | 0           |         |
| mean                                 | 51.5        | 44.6        |             |         |
| SD                                   | 12.99       | 12.60       |             |         |
| <b>rs3817963 / BTNL2 (T&gt;C)</b>    | <b>T/T</b>  | <b>T/C</b>  | <b>C/C</b>  |         |
| Age (years)                          |             |             |             | 0.0311  |
| n                                    | 60          | 48          | 17          |         |
| mean                                 | 52.5        | 50.4        | 43.0        |         |
| SD                                   | 13.49       | 13.02       | 9.69        |         |
| <b>rs1974226 / IL17A (C&gt;T)</b>    | <b>C/C</b>  | <b>C/T</b>  | <b>T/T</b>  |         |
| Age (years)                          |             |             |             | 0.0411  |
| n                                    | 89          | 29          | 7           |         |
| mean                                 | 48.8        | 52.5        | 60.7        |         |
| SD                                   | 13.19       | 11.65       | 14.13       |         |
| <b>rs2240336 / PADI4 (C&gt;T)</b>    | <b>C/C</b>  | <b>C/T</b>  | <b>T/T</b>  |         |
| Disease duration (years)             |             |             |             | 0.0038  |
| n                                    | 46          | 62          | 17          |         |
| mean                                 | 3.91        | 8.05        | 5.91        |         |
| Q1, Q3                               | 1.85, 8.35  | 4.16, 13.07 | 2.23, 9.97  |         |
| <b>rs4810485 / CD40 (T&gt;G)</b>     | <b>T/T</b>  | <b>T/G</b>  | <b>G/G</b>  |         |
| Disease duration (years)             |             |             |             | 0.0110  |
| n                                    | 7           | 43          | 75          |         |
| mean                                 | 11.16       | 3.66        | 6.24        |         |
| Q1, Q3                               | 9.97, 13.48 | 1.45, 8.35  | 3.16, 11.35 |         |
| <b>rs3817963 / BTNL2 (T&gt;C)</b>    | <b>T/T</b>  | <b>T/C</b>  | <b>C/C</b>  |         |
| Disease duration (years)             |             |             |             | 0.0131  |
| n                                    | 60          | 48          | 17          |         |
| mean                                 | 7.70        | 3.52        | 6.71        |         |
| Q1, Q3                               | 4.21, 11.65 | 1.36, 8.30  | 3.88, 11.03 |         |
| <b>rs3213422 / DHODH (A&gt;C)</b>    | <b>A/A</b>  | <b>A/C</b>  | <b>C/C</b>  |         |
| Disease duration (years)             |             |             |             | 0.0132  |
| n                                    | 27          | 63          | 35          |         |
| mean                                 | 8.35        | 6.13        | 4.16        |         |
| Q1, Q3                               | 3.66, 13.48 | 2.75, 11.47 | 1.10, 7.46  |         |

Table S1. Statistically significant results of an association analysis between SNPs of non-HLA genes and clinical baseline characteristics of patients.

|                                      |                  |                 |                |        |
|--------------------------------------|------------------|-----------------|----------------|--------|
| <b>rs360718 / IL18 (A&gt;C)</b>      | <b>A/A</b>       | <b>A/C</b>      | <b>C/C</b>     |        |
| Disease duration (years)             |                  |                 |                | 0.0240 |
| n                                    | 69               | 49              | 7              |        |
| mean                                 | 5.17             | 8.38            | 1.44           |        |
| Q1, Q3                               | 2.50, 8.84       | 4.16, 13.48     | 0.73, 13.07    |        |
| <b>rs187238 / IL18 (C&gt;G)</b>      | <b>C/C</b>       | <b>C/G</b>      | <b>G/G</b>     |        |
| Disease duration (years)             |                  |                 |                | 0.0244 |
| N                                    | 72               | 48              | 5              |        |
| Mean                                 | 5.19             | 8.55            | 1.44           |        |
| Q1, Q3                               | 2.41, 8.91       | 4.02, 13.97     | 1.10, 4.20     |        |
| <b>rs360717 / IL18 (G&gt;A)</b>      | <b>G/G</b>       | <b>G/A</b>      | <b>A/A</b>     |        |
| Disease duration (years)             |                  |                 |                | 0.0449 |
| n                                    | 72               |                 | 53 (G/A + A/A) |        |
| Mean                                 | 5.19             |                 | 8.34           |        |
| Q1, Q3                               | 2.41, 8.91       |                 | 3.16, 13.48    |        |
| <b>rs2301888 / PADI4 (G&gt;A)</b>    | <b>G/G</b>       | <b>G/A</b>      | <b>A/A</b>     |        |
| Disease duration (years)             |                  |                 |                | 0.0293 |
| n                                    | 59               | 51              | 15             |        |
| Mean                                 | 4.20             | 8.34            | 5.91           |        |
| Q1, Q3                               | 2.32, 8.47       | 4.52, 13.07     | 2.23, 10.86    |        |
| <b>rs2476601 / PTPN22 (A&gt;G)</b>   | <b>A/A</b>       | <b>A/G</b>      | <b>G/G</b>     |        |
| Disease duration (years)             |                  |                 |                | 0.0414 |
| n                                    | 13               | 32              | 80             |        |
| Mean                                 | 3.37             | 4.68            | 7.08           |        |
| Q1, Q3                               | 2.06, 6.73       | 1.44, 8.41      | 3.54, 11.50    |        |
| <b>rs1801133 / MTHFR (G&gt;A)</b>    | <b>G/G</b>       | <b>G/A</b>      | <b>A/A</b>     |        |
| Baseline CRP (mg/mL)                 |                  |                 |                | 0.0299 |
| n                                    | 68               | 49              | 8              |        |
| mean                                 | 2.79             | 2.68            | 1.88           |        |
| SD                                   | 0.848            | 0.985           | 0.966          |        |
| <b>rs3213422 / DHODH (A&gt;C)</b>    | <b>A/A</b>       | <b>A/C</b>      | <b>C/C</b>     |        |
| Baseline CRP (mg/mL)                 |                  |                 |                | 0.0410 |
| n                                    | 27               | 63              | 35             |        |
| Mean                                 | 12.0             | 13.0            | 20.0           |        |
| Q1, Q3                               | 7.0, 22.0        | 6.0, 24.0       | 11.0, 41.0     |        |
| <b>rs7530511 / IL23R (T&gt;C)</b>    | <b>T/T</b>       | <b>T/C</b>      | <b>C/C</b>     |        |
| Baseline ACPA (IU/mL)                |                  |                 |                | 0.0038 |
| n                                    | 3                | 32              | 88             |        |
| mean                                 | 2840.40          | 626.40          | 131.50         |        |
| Q1, Q3                               | 1176.70, 3018.40 | 155.50, 1220.05 | 55.85, 672.30  |        |
| Baseline ACPA (IU/mL) n              |                  |                 |                | 0.0046 |
| n                                    | 35 (TT+TC)       |                 | 88             |        |
| Mean                                 | 663.50           |                 | 131.50         |        |
| Q1, Q3                               | 194.70, 1296.90  |                 | 55.85, 672.30  |        |
| <b>rs7539625 / IL23R (G&gt;A)</b>    | <b>G/G</b>       | <b>G/A</b>      | <b>A/A</b>     |        |
| Baseline ACPA (IU/mL)                |                  |                 |                | 0.0140 |
| n                                    | 67               | 50              | 6              |        |
| mean                                 | 336.60           | 250.20          | 37.30          |        |
| Q1, Q3                               | 71.70, 1296.90   | 70.80, 685.00   | 1.10, 89.80    |        |
| Baseline уровень АСРА (МЕ/мл)        |                  |                 |                | 0.0369 |
| n                                    | 67               |                 | 56 (G/A+A/A)   |        |
| Mean                                 | 336.60           |                 | 148.05         |        |
| Q1, Q3                               | 71.70, 1296.90   |                 | 37.30, 651.10  |        |
| <b>rs1800693 / TNFRSF1A (T&gt;C)</b> | <b>T/T</b>       | <b>T/C</b>      | <b>C/C</b>     |        |
| Baseline ACPA (IU/mL)                |                  |                 |                | 0.0096 |

Table S1. Statistically significant results of an association analysis between SNPs of non-HLA genes and clinical baseline characteristics of patients.

|                                     |                  |                |                  |        |
|-------------------------------------|------------------|----------------|------------------|--------|
| N                                   | 41               | 59             | 23               |        |
| Mean                                | 631.10           | 108.80         | 323.40           |        |
| Q1, Q3                              | 116.20, 1060.10  | 18.60, 621.70  | 52.40, 1460.40   |        |
| <b>rs3218253 / IL2RB (G&gt;A)</b>   | <b>G/G</b>       | <b>G/A</b>     | <b>A/A</b>       |        |
| Baseline ACPA (IU/mL) n             |                  |                |                  | 0.0215 |
| n                                   | 78               | 40             | 5                |        |
| Mean                                | 239.20           | 200.05         | 1376.40          |        |
| Q1, Q3                              | 59.30, 759.40    | 56.70, 834.50  | 1301.30, 1710.50 |        |
| <b>rs767455 / TNFRSF1A (T&gt;C)</b> | <b>T/T</b>       | <b>T/C</b>     | <b>C/C</b>       |        |
| Baseline ACPA ACCP (IU/mL) n        |                  |                |                  | 0.0215 |
| n                                   | 38               | 56             | 29               |        |
| Mean                                | 407.55           | 110.65         | 323.40           |        |
| Q1, Q3                              | 116.20, 999.00   | 11.30, 641.05  | 61.00, 1185.70   |        |
| <b>rs10889671 / IL23R (A&gt;G)</b>  | <b>A/A</b>       | <b>A/G</b>     | <b>G/G</b>       |        |
| Baseline ACPA (IU/mL) n             |                  |                |                  | 0.0277 |
| N                                   | 3                | 32             | 88               |        |
| Mean                                | 2840.40          | 422.10         | 151.80           |        |
| Q1, Q3                              | 1176.70, 3018.40 | 80.50, 960.10  | 60.15, 748.85    |        |
| <b>rs7574865 / STAT4 (T&gt;G)</b>   | <b>T/T</b>       | <b>T/G</b>     | <b>G/G</b>       |        |
| Baseline ACPA (IU/mL) n             |                  |                |                  | 0.0369 |
| n                                   | 8                | 52             | 63               |        |
| Mean                                | 109.70           | 376.65         | 236.70           |        |
| Q1, Q3                              | 0.90, 119.20     | 82.00, 1181.15 | 22.20, 704.00    |        |
| <b>rs2228144 / IL6R (G&gt;A)</b>    | <b>G/G</b>       |                | <b>G/A + A/A</b> |        |
| Baseline ACPA (IU/mL) n             |                  |                |                  | 0.0430 |
| n                                   | 81               |                | 42               |        |
| Mean                                | 381.90           |                | 112.05           |        |
| Q1, Q3                              | 80.70, 1024.50   |                | 19.60, 427.50    |        |
| <b>rs4845374 / IL6R (T&gt;A)</b>    | <b>T/T</b>       |                | <b>T/A + A/A</b> |        |
| Baseline ACPA (IU/mL) n             |                  |                |                  | 0.0470 |
| n                                   | 79               |                | 44               |        |
| Mean                                | 381.90           |                | 119.25           |        |
| Q1, Q3                              | 80.30, 1060.10   |                | 20.90, 479.65    |        |
| <b>rs11541076 / IRAK3 (A&gt;T)</b>  | <b>A/A</b>       | <b>A/T</b>     | <b>T/T</b>       |        |
| Baseline RF (IU/mL) n               |                  |                |                  | 0.0113 |
| n                                   | 97               | 26             | 2                |        |
| Mean                                | 117.0            | 42.5           | 24.0             |        |
| Q1, Q3                              | 39.0, 334.0      | 15.0, 119.0    | 11.0, 37.0       |        |
| Baseline RF (IU/mL) n               |                  |                |                  | 0.0040 |
| n                                   | 97               |                | 28 (A/T + T/T)   |        |
| Mean                                | 117.0            |                | 40.5             |        |
| Q1, Q3                              | 39.0, 334.0      |                | 14.0, 99.5       |        |
| <b>rs1801275 / IL4R (A&gt;G)</b>    | <b>A/A</b>       | <b>A/G</b>     | <b>G/G</b>       |        |
| Baseline RF (IU/mL) n               |                  |                |                  | 0.0272 |
| n                                   | 77               | 44             | 4                |        |
| Mean                                | 111.0            | 60.5           | 339.0            |        |
| Q1, Q3                              | 34.0, 321.0      | 27.0, 165.5    | 176.5, 475.5     |        |
| <b>rs2104286 / IL2RA (T&gt;C)</b>   | <b>T/T</b>       | <b>T/C</b>     | <b>C/C</b>       |        |
| Baseline RF (IU/mL) n               |                  |                |                  | 0.0418 |
| n                                   | 77               |                | 48 (T/C+C/C)     |        |
| Mean                                | 117.0            |                | 55.0             |        |
| Q1, Q3                              | 39.0, 334.0      |                | 21.0, 239.5      |        |
| <b>rs11203367 / PADI4 (T&gt;C)</b>  | <b>T/T</b>       | <b>T/C</b>     | <b>C/C</b>       |        |
| Baseline CDAI                       |                  |                |                  | 0.0086 |

Table S1. Statistically significant results of an association analysis between SNPs of non-HLA genes and clinical baseline characteristics of patients.

|                                    |              |              |                |        |
|------------------------------------|--------------|--------------|----------------|--------|
| n                                  | 27           | 62           | 34             |        |
| Mean                               | 37.20        | 40.10        | 34.95          |        |
| Q1, Q3                             | 34.00, 43.40 | 34.90, 49.00 | 29.80, 39.50   |        |
| <b>rs2240340 / PADI4 (T&gt;C)</b>  | <b>T/T</b>   | <b>T/C</b>   | <b>C/C</b>     |        |
| Baseline CDAI                      |              |              |                | 0.0115 |
| n                                  | 27           | 61           | 35             |        |
| Mean                               | 37.20        | 39.40        | 35.60          |        |
| Q1, Q3                             | 34.00, 43.40 | 34.90, 49.00 | 29.80, 40.80   |        |
| <b>rs11203366 / PADI4 (G&gt;A)</b> | <b>G/G</b>   | <b>G/A</b>   | <b>A/A</b>     |        |
| Исходное значение CDAI             |              |              |                | 0.0171 |
| n                                  | 26           | 62           | 35             |        |
| Медиана                            | 36.80        | 39.10        | 35.60          |        |
| Q1, Q3                             | 34.00, 43.40 | 34.90, 49.00 | 29.80, 41.20   |        |
| <b>rs2243250 / IL4 (C&gt;T)</b>    | <b>C/C</b>   | <b>C/T</b>   | <b>T/T</b>     |        |
| Baseline CDAI                      |              |              |                | 0.0142 |
| n                                  | 69           | 45           | 9              |        |
| Mean                               | 35.60        | 39.30        | 41.16          |        |
| Q1, Q3                             | 31.63, 42.40 | 35.20, 47.40 | 35.90, 50.10   |        |
| Baseline CDAI                      |              |              |                | 0.0048 |
| n                                  | 69           |              | 54 (C/T+T/T)   |        |
| Mean                               | 35.60        |              | 40.10          |        |
| Q1, Q3                             | 31.63, 42.40 |              | 35.30, 47.50   |        |
| <b>rs2069849 / IL6 (C&gt;T)</b>    | <b>C/C</b>   | <b>C/T</b>   | <b>T/T</b>     |        |
| Baseline CDAI                      |              |              |                | 0.0317 |
| n                                  | 120          | 3            | 0              |        |
| Mean                               | 37.95        | 30.60        |                |        |
| Q1, Q3                             | 33.45, 45.65 | 25.50, 33.80 |                |        |
| Baseline CDAI                      |              |              |                | 0.0324 |
| n                                  | 120          |              | 3 (C/T + T/T)  |        |
| Mean                               | 37.95        |              | 30.60          |        |
| Q1, Q3                             | 33.45, 45.65 |              | 25.50, 33.80   |        |
| <b>rs1801275 / IL4R (A&gt;G)</b>   | <b>A/A</b>   | <b>A/G</b>   | <b>G/G</b>     |        |
| Baseline CDAI                      |              |              |                | 0.0408 |
| n                                  | 75           | 44           | 4              |        |
| Mean                               | 36.30        | 38.60        | 51.25          |        |
| Q1, Q3                             | 32.80, 43.10 | 33.45, 46.80 | 44.45, 62.75   |        |
| <b>rs10889671 / IL23R (A&gt;G)</b> | <b>A/A</b>   | <b>A/G</b>   | <b>G/G</b>     |        |
| Baseline CDAI                      |              |              |                | 0.0460 |
| n                                  | 88           |              | 35 (A/G + A/A) |        |
| Mean                               | 38.75        |              | 35.30          |        |
| Q1, Q3                             | 34.15, 47.20 |              | 32.80, 39.40   |        |
| <b>rs1801275 / IL4R (A&gt;G)</b>   | <b>A/A</b>   | <b>A/G</b>   | <b>G/G</b>     |        |
| Baseline DAS28- CRP                |              |              |                | 0.0017 |
| n                                  | 75           | 44           | 4              |        |
| Mean                               | 5.94         | 5.84         | 7.02           |        |
| SD                                 | 0.594        | 0.642        | 0.733          |        |
| <b>rs11203367 / PADI4 (T&gt;C)</b> | <b>T/T</b>   | <b>T/C</b>   | <b>C/C</b>     |        |
| Baseline DAS28- CRP                |              |              |                | 0.0123 |
| n                                  | 27           | 62           | 34             |        |
| Mean                               | 5.84         | 6.10         | 5.72           |        |
| CO                                 | 0.593        | 0.670        | 0.560          |        |
| <b>rs2243250 / IL4 (C&gt;T)</b>    | <b>C/C</b>   | <b>C/T</b>   | <b>T/T</b>     |        |
| Baseline DAS28- CRP                |              |              |                | 0.0152 |
| n                                  | 69           | 45           | 9              |        |
| Mean                               | 5.79         | 6.10         | 6.23           |        |

Table S1. Statistically significant results of an association analysis between SNPs of non-HLA genes and clinical baseline characteristics of patients.

|                                    |            |            |                |        |
|------------------------------------|------------|------------|----------------|--------|
| SD                                 | 0.630      | 0.604      | 0.713          |        |
| Baseline DAS28- CRP                |            |            |                | 0.0045 |
| n                                  | 69         |            | 54 (C/T+T/T)   |        |
| Mean                               | 5.79       |            | 6.12           |        |
| CO                                 | 0.630      |            | 0.618          |        |
| <b>rs11203366 / PADI4 (G&gt;A)</b> | <b>G/G</b> | <b>G/A</b> | <b>A/A</b>     |        |
| Baseline DAS28- CRP                |            |            |                | 0.0158 |
| n                                  | 26         | 62         | 35             |        |
| Mean                               | 5.84       | 6.10       | 5.73           |        |
| SD                                 | 0.605      | 0.672      | 0.555          |        |
| <b>rs2240340 / PADI4 (T&gt;C)</b>  | <b>T/T</b> | <b>T/C</b> | <b>C/C</b>     |        |
| Baseline DAS28- CRP                |            |            |                | 0.0207 |
| n                                  | 27         | 61         | 35             |        |
| Mean                               | 5.84       | 6.10       | 5.74           |        |
| SD                                 | 0.593      | 0.674      | 0.567          |        |
| <b>rs10889671 / IL23R (A&gt;G)</b> | <b>A/A</b> | <b>A/G</b> | <b>G/G</b>     |        |
| Baseline DAS28- CRP                |            |            |                | 0.0233 |
| n                                  | 88         |            | 35 (A/G + A/A) |        |
| Mean                               | 6.01       |            | 5.76           |        |
| SD                                 | 0.693      |            | 0.461          |        |
| <b>rs2069849 / IL6 (C&gt;T)</b>    | <b>C/C</b> | <b>C/T</b> | <b>T/T</b>     |        |
| Baseline DAS28- CRP                |            |            |                | 0.0463 |
| n                                  | 120        | 3          | 0              |        |
| Mean                               | 5.96       | 5.21       |                |        |
| SD                                 | 0.640      | 0.196      |                |        |
| <b>rs11203366 / PADI4 (G&gt;A)</b> | <b>G/G</b> | <b>G/A</b> | <b>A/A</b>     |        |
| Baseline HAQ-DI                    |            |            |                | 0.0025 |
| n                                  | 26         | 62         | 35             |        |
| Mean                               | 1.5096     | 1.8407     | 1.5536         |        |
| SD                                 | 0.6214     | 0.4573     | 0.3898         |        |
| <b>rs11203367 / PADI4 (T&gt;C)</b> | <b>T/T</b> | <b>T/C</b> | <b>C/C</b>     |        |
| Baseline HAQ-DI                    |            |            |                | 0.0066 |
| n                                  | 27         | 62         | 34             |        |
| Среднее                            | 1.5324     | 1.8286     | 1.5588         |        |
| SD                                 | 0.6207     | 0.4595     | 0.3944         |        |
| <b>rs2240340 / PADI4 (T&gt;C)</b>  | <b>T/T</b> | <b>T/C</b> | <b>C/C</b>     |        |
| Baseline HAQ-DI                    |            |            |                | 0.0137 |
| n                                  | 27         | 61         | 35             |        |
| Mean                               | 1.5324     | 1.8197     | 1.5821         |        |
| SD                                 | 0.6207     | 0.4579     | 0.4123         |        |
| <b>rs17602729 / AMPD1 (G&gt;A)</b> | <b>G/G</b> | <b>G/A</b> | <b>A/A</b>     |        |
| Baseline HAQ-DI                    |            |            |                | 0.0368 |
| n                                  | 89         | 28         | 6              |        |
| Mean                               | 1.7107     | 1.5357     | 2.0833         |        |
| SD                                 | 0.4521     | 0.6188     | 0.3227         |        |
| <b>rs874881 / PADI4 (G&gt;C)</b>   | <b>G/G</b> | <b>G/C</b> | <b>C/C</b>     |        |
| Baseline HAQ-DI                    |            |            |                | 0.0428 |
| n                                  | 33         | 62         | 28             |        |
| Mean                               | 1.5871     | 1.8004     | 1.5625         |        |
| SD                                 | 0.5867     | 0.4883     | 0.3527         |        |

CO= Standard deviation; CRP = C-reactive protein; DAS28 = Disease Activity Score 28-joint Count; CDAI = Clinical Disease Activity Index; HAQ-DI = Health Assessment Questionnaire – Disability Index; ACPA – anti -citruinated peptide antibodies. RF- rheumatoid factor. n: the number of patients in the corresponding category or the number of valid observations.

Q1 (Q3): 1 (3) quartile.
